# Supplementary material for: A study on optical properties of various hot drug molecules by 2020
Source: Royal Society of Chemistry journal article supplement (doi:10.1039/d3nj00973d), 2023-01-01
Supplement: d3nj00973d1.pdf [file d3nj00973d1.pdf]

## Supporting Information

### A study on optical properties for various hot drug molecules

by 2020

Chun Zhang<sup>a,#</sup>, Yv-Ting Yang<sup>a,#</sup>, Xue Yan<sup>a</sup>, Yi-Tao Sun<sup>a</sup>, An-Dong Shao<sup>a</sup>, Si-Nuo Gao<sup>a</sup>, Yu-Bo Zhou<sup>b,c</sup>, Ai-Min Ren<sup>d\*</sup>, Jia Li<sup>b,c\*</sup>, Wen-Long Wang<sup>a\*</sup>

<sup>a</sup>*School of Life Sciences and Health Engineering, Jiangnan University, Jiangsu, 214122, China. E-mail: [wwenlong2011@163.com](mailto:wwenlong2011@163.com)(W-L. W.)*

<sup>b</sup>*National Center for Drug Screening, State key Laboratory of Drug Research, Shanghai Institute of Materia Medica, Chinese Academy of Sciences, Shanghai, 201203, China. E-mail: [jli@simm.ac.cn](mailto:jli@simm.ac.cn)*

<sup>c</sup>*Zhongshan Institute for Drug Discovery, Shanghai Institute of Materia Medica, Chinese Academy of Sciences, SSIP Healthcare and Medicine Demonstration Zone, Zhongshan Tsuihang New District, Zhongshan, Guangdong528400*

<sup>d</sup>*Institute of Theoretical Chemistry, College of Chemistry, Jilin University, Liutiao Road 2#, Changchun 130061, P.R. China. E-mail: [renam@jlu.edu.cn](mailto:renam@jlu.edu.cn)*

## Table of Contents

Table S1. The stable geometries of 39 drug molecules among top 200 pharmaceuticals by retails in 2020.

Figure S1. The electrostatic surface potential for **18** and **134** compounds based on the stable ground state geometries.

Table S2. The calculated fluorescent spectra of all the studied 39 molecules.

Figure S2. The UV-vis spectra of (A) molecule **18** and (B) **134** with the concentration of 100  $\mu\text{M}$  in different solvent (100%DMSO, 50%DMSO and 10%DMSO).

Table S3. Calculated ground state transient dipole moment ( $\mu^{00}$ ) of **18** and **134** compounds with DMSO and H<sub>2</sub>O solvent model.

Figure S3. The emission spectra of compound **18** (A) and **134** (B) with different concentration in 10%DMSO-90%PBS solvent.

Table S4. The calculated energies of HOMO, LUMO and HOMO-LUMO gap for molecule **134**, **134-E** and **134-RETCl**.

Figure S4. The UV-vis (A) and emission spectra (by excited at 370 nm, B) of compound **18** using 10%DMSO-90%H<sub>2</sub>O and 10%DMSO-90%PBS solvent from experiments.

Figure S5. The emission spectra of compound **134** by excitation at 405 nm (black) and 488 nm (red) wavelength in 10%DMSO-90%PBS solvent.

Figure S6. Confocal microscopy colocalization images of compound **134** with 10  $\mu\text{M}$  in HeLa cells.

Table S5. Calculated TPA properties including the maximum TPA cross-section ( $\sigma_{max}^{TPA}$ ), corresponding TPA wavelength ( $\lambda_{max}^{TPA}$ ), and transition nature of **18** and **134** in gas (a) and water (b) by B3LYP functional.

Table S1. The stable geometries of 39 drug molecules among top 200 pharmaceuticals by retails in 2020.

| Molecules | Top view                                                                            | Side view                                                                            |
|-----------|-------------------------------------------------------------------------------------|--------------------------------------------------------------------------------------|
| 3         | 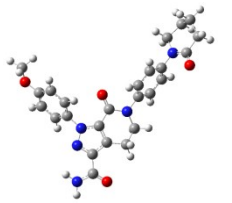   |    |
| 5         |    |   |
| 18        |    |    |
| 21        |   |   |
| 24        |  |  |
| 58        |  |  |
| 62        |  |  |
| 64        |  |  |

67

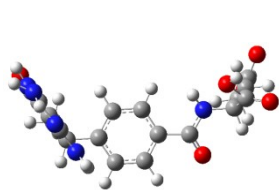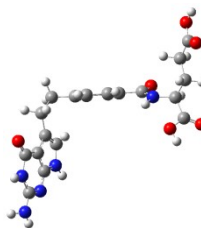

80

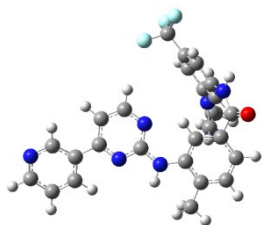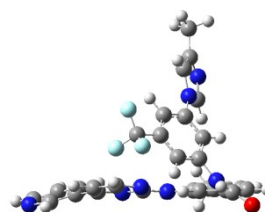

87

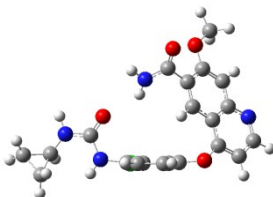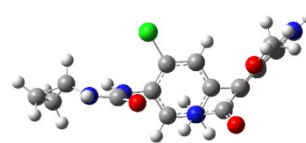

94

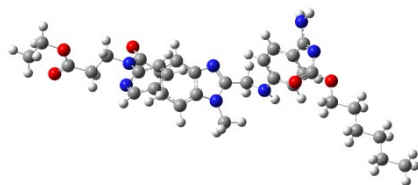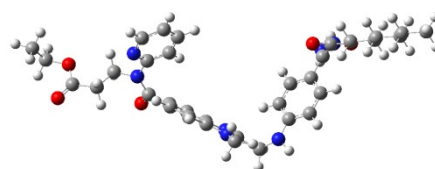

96

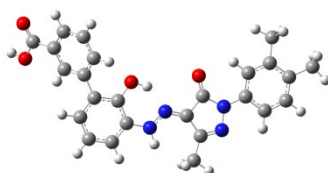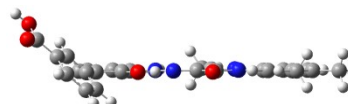

100

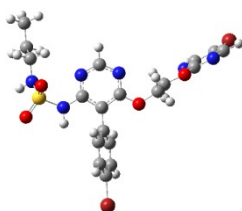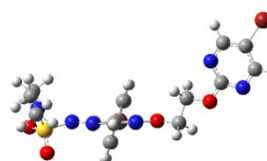

104

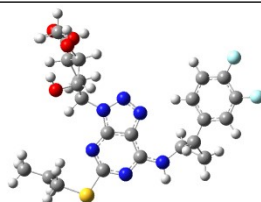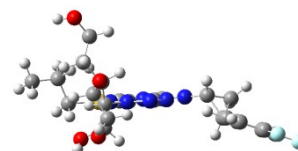

115

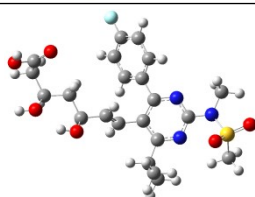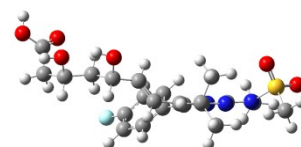

---

120

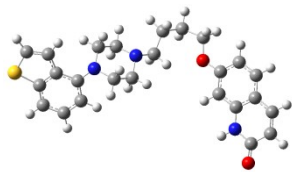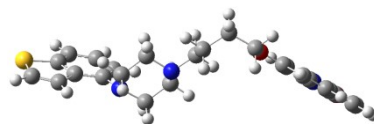

---

121

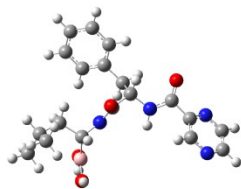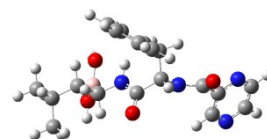

---

126

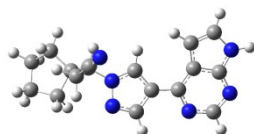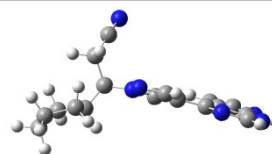

---

128

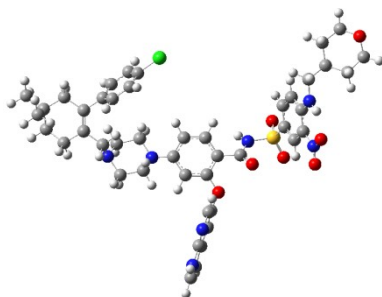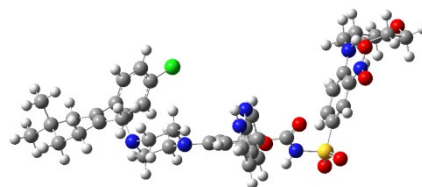

---

131

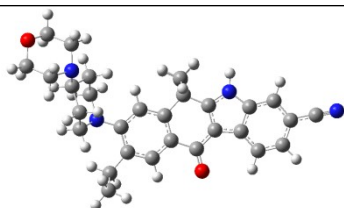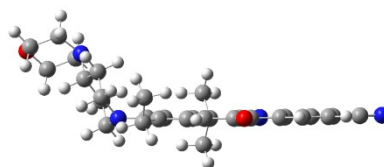

---

132

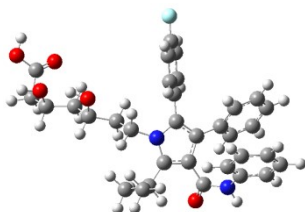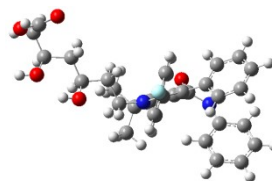

---

133

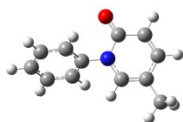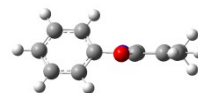

---

134

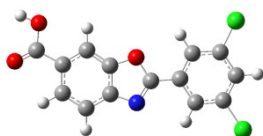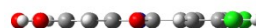

136

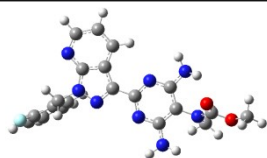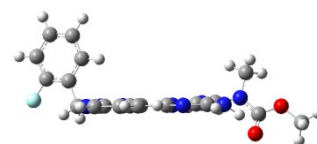

141

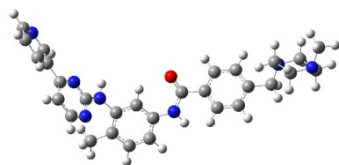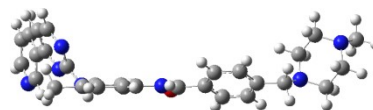

149

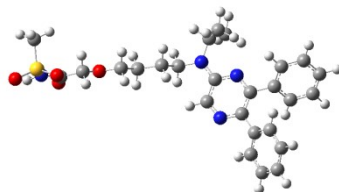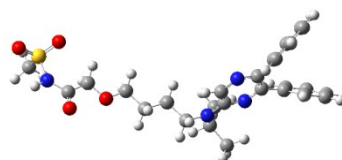

164

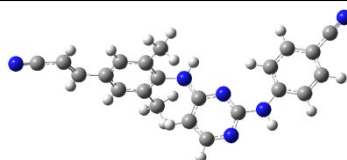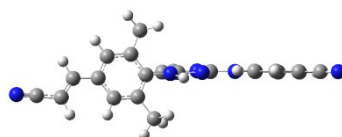

165

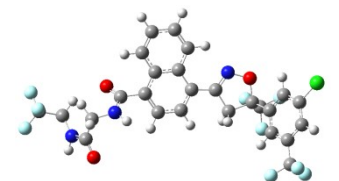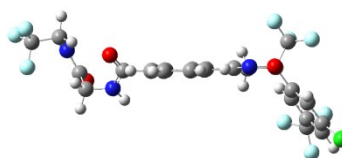

171

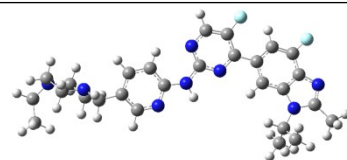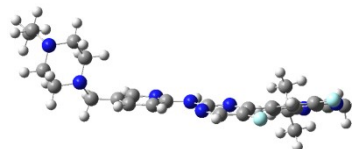

180

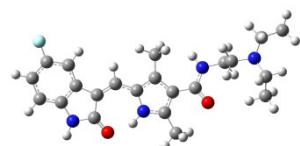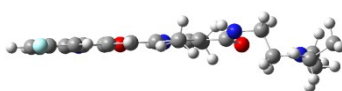

187

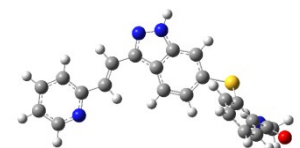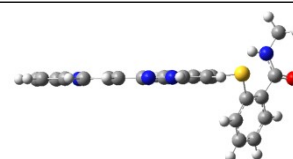

191

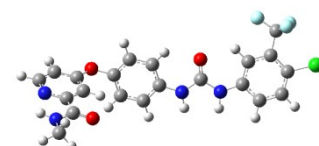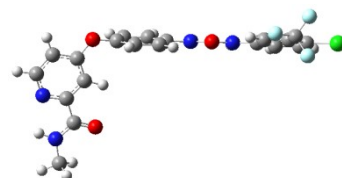

193

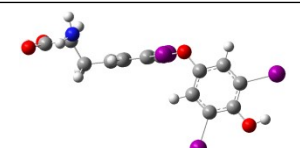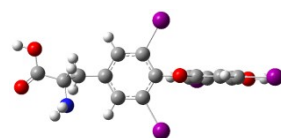

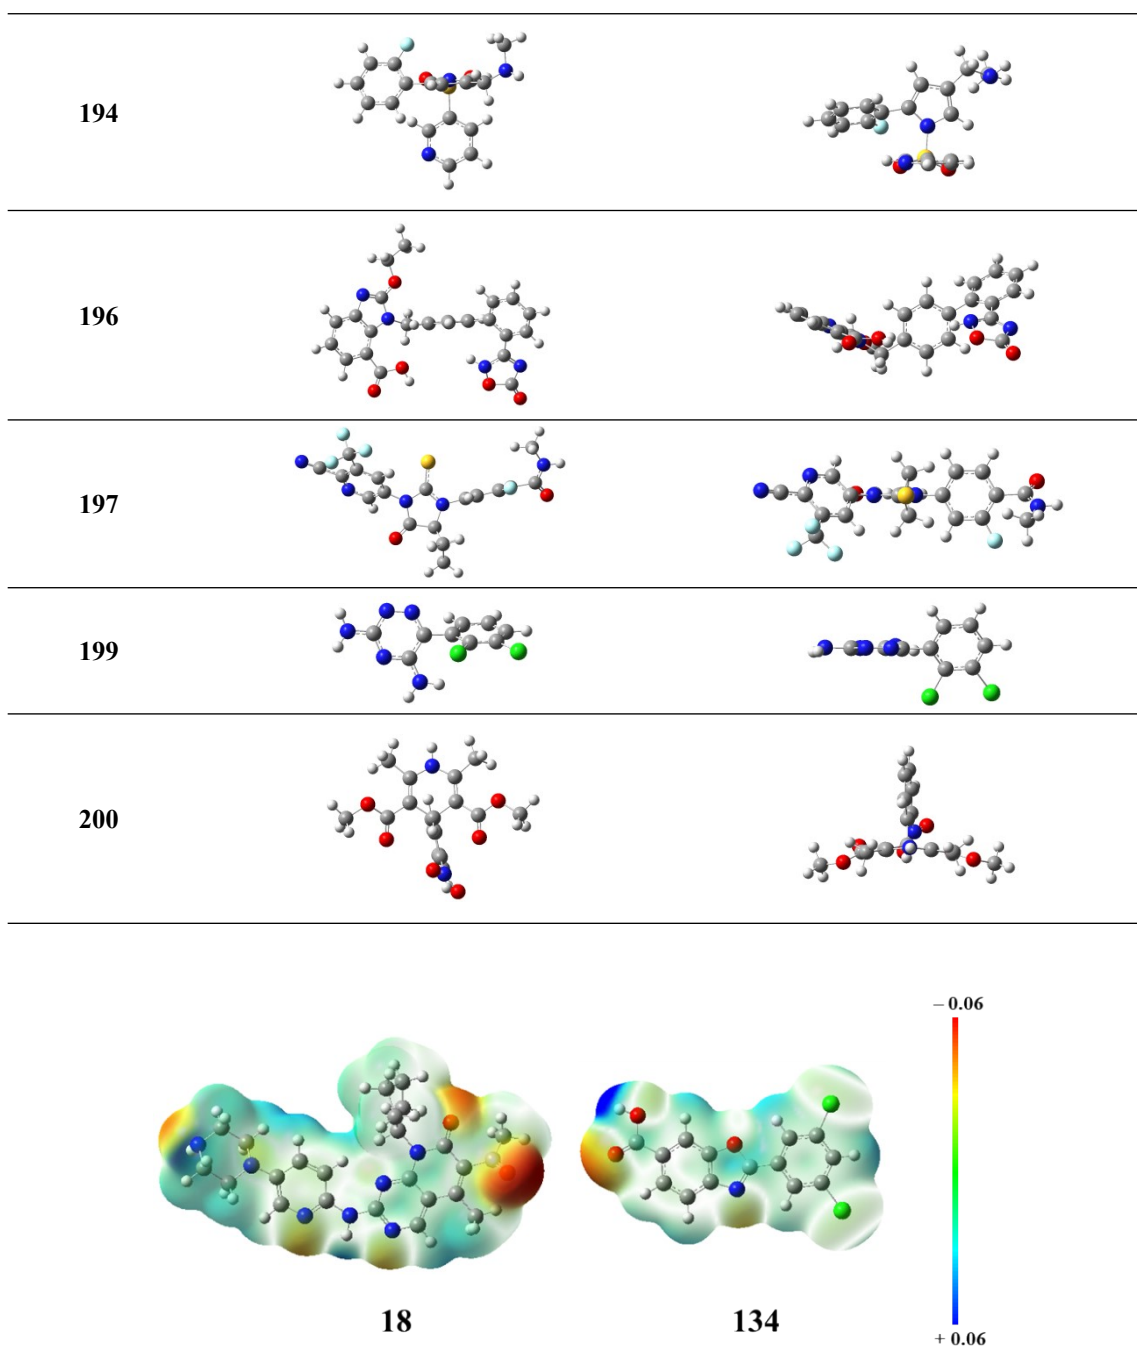

Figure S1. The electrostatic surface potential for **18** and **134** compounds based on the stable ground state geometries.

Table S2. The calculated fluorescent spectra of all the studied 39 molecules.

| Molecules | $\lambda^{\text{EMI}}/\text{nm}$ | Oscillator Strength | Transition natures                 |
|-----------|----------------------------------|---------------------|------------------------------------|
| <b>3</b>  | 471.6 <sup>a</sup>               | 0.3880 <sup>a</sup> | $S_1 \rightarrow S_0$ <sup>a</sup> |
| <b>5</b>  | 397.3 <sup>a</sup>               | 0.5432 <sup>a</sup> | $S_1 \rightarrow S_0$ <sup>a</sup> |
| <b>18</b> | 690.1 <sup>a</sup>               | 0.6147 <sup>a</sup> | $S_1 \rightarrow S_0$ <sup>a</sup> |
| <b>21</b> | 469.4 <sup>a</sup>               | 0.0208 <sup>a</sup> | $S_1 \rightarrow S_0$ <sup>a</sup> |
|           | 497.7 <sup>b</sup>               | 0.0034 <sup>b</sup> | $S_1 \rightarrow S_0$ <sup>b</sup> |

|            |                    |                     |                                             |
|------------|--------------------|---------------------|---------------------------------------------|
| <b>24</b>  | 809.4 <sup>a</sup> | 0.0257 <sup>a</sup> | S <sub>1</sub> →S <sub>0</sub> <sup>a</sup> |
| <b>58</b>  | 339.2 <sup>a</sup> | 0.4459 <sup>a</sup> | S <sub>1</sub> →S <sub>0</sub> <sup>a</sup> |
| <b>62</b>  | 654.6 <sup>a</sup> | 0.0077 <sup>a</sup> | S <sub>1</sub> →S <sub>0</sub> <sup>a</sup> |
| <b>64</b>  | 604.6 <sup>a</sup> | 0.0793 <sup>a</sup> | S <sub>1</sub> →S <sub>0</sub> <sup>a</sup> |
| <b>67</b>  | 521.5 <sup>a</sup> | 0.0031 <sup>a</sup> | S <sub>1</sub> →S <sub>0</sub> <sup>a</sup> |
| <b>80</b>  | 480.9 <sup>a</sup> | 0.0249 <sup>a</sup> | S <sub>1</sub> →S <sub>0</sub> <sup>a</sup> |
|            | 355.2 <sup>b</sup> | 0.1418 <sup>b</sup> | S <sub>1</sub> →S <sub>0</sub> <sup>b</sup> |
| <b>87</b>  | 511.6 <sup>a</sup> | 0.0016 <sup>a</sup> | S <sub>1</sub> →S <sub>0</sub> <sup>a</sup> |
| <b>94</b>  | 388.0 <sup>a</sup> | 0.7767 <sup>a</sup> | S <sub>1</sub> →S <sub>0</sub> <sup>a</sup> |
| <b>96</b>  | 769.2 <sup>a</sup> | 0.0177 <sup>a</sup> | S <sub>1</sub> →S <sub>0</sub> <sup>a</sup> |
| <b>100</b> | 347.9 <sup>a</sup> | 0.0071 <sup>a</sup> | S <sub>1</sub> →S <sub>0</sub> <sup>a</sup> |
| <b>104</b> | 542.8 <sup>a</sup> | 0.4810 <sup>a</sup> | S <sub>1</sub> →S <sub>0</sub> <sup>a</sup> |
| <b>115</b> | 573.5 <sup>a</sup> | 0.1361 <sup>a</sup> | S <sub>1</sub> →S <sub>0</sub> <sup>a</sup> |
| <b>120</b> | 483.0 <sup>a</sup> | 0.0001 <sup>a</sup> | S <sub>1</sub> →S <sub>0</sub> <sup>a</sup> |
| <b>121</b> | 433.2 <sup>a</sup> | 0.0011 <sup>a</sup> | S <sub>1</sub> →S <sub>0</sub> <sup>a</sup> |
| <b>126</b> | 388.3 <sup>a</sup> | 0.5630 <sup>a</sup> | S <sub>1</sub> →S <sub>0</sub> <sup>a</sup> |
| <b>128</b> | 569.2 <sup>a</sup> | 0.0057 <sup>a</sup> | S <sub>1</sub> →S <sub>0</sub> <sup>a</sup> |
| <b>131</b> | 456.7 <sup>a</sup> | 0.7472 <sup>a</sup> | S <sub>1</sub> →S <sub>0</sub> <sup>a</sup> |
| <b>132</b> | 497.3 <sup>a</sup> | 0.0092 <sup>a</sup> | S <sub>1</sub> →S <sub>0</sub> <sup>a</sup> |
| <b>133</b> | 386.4 <sup>a</sup> | 0.2869 <sup>a</sup> | S <sub>1</sub> →S <sub>0</sub> <sup>a</sup> |
| <b>134</b> | 408.5 <sup>a</sup> | 1.4772 <sup>a</sup> | S <sub>1</sub> →S <sub>0</sub> <sup>a</sup> |
| <b>136</b> | 428.2 <sup>a</sup> | 0.3776 <sup>a</sup> | S <sub>1</sub> →S <sub>0</sub> <sup>a</sup> |
| <b>141</b> | 677.0 <sup>a</sup> | 0.0001 <sup>a</sup> | S <sub>1</sub> →S <sub>0</sub> <sup>a</sup> |
| <b>149</b> | 567.0 <sup>a</sup> | 0.2323 <sup>a</sup> | S <sub>1</sub> →S <sub>0</sub> <sup>a</sup> |
| <b>164</b> | 435.4 <sup>a</sup> | 1.3784 <sup>a</sup> | S <sub>1</sub> →S <sub>0</sub> <sup>a</sup> |
| <b>165</b> | 454.2 <sup>a</sup> | 0.4902 <sup>a</sup> | S <sub>1</sub> →S <sub>0</sub> <sup>a</sup> |
| <b>171</b> | 585.9 <sup>a</sup> | 0.0010 <sup>a</sup> | S <sub>1</sub> →S <sub>0</sub> <sup>a</sup> |
| <b>180</b> | 543.9 <sup>a</sup> | 0.6580 <sup>a</sup> | S <sub>1</sub> →S <sub>0</sub> <sup>a</sup> |
| <b>187</b> | 449.2 <sup>a</sup> | 1.2937 <sup>a</sup> | S <sub>1</sub> →S <sub>0</sub> <sup>a</sup> |
| <b>191</b> | 512.5 <sup>a</sup> | 0.0042 <sup>a</sup> | S <sub>1</sub> →S <sub>0</sub> <sup>a</sup> |
| <b>193</b> | 673.5 <sup>a</sup> | 0.0001 <sup>a</sup> | S <sub>1</sub> →S <sub>0</sub> <sup>a</sup> |
| <b>194</b> | 497.7 <sup>a</sup> | 0.0021 <sup>a</sup> | S <sub>1</sub> →S <sub>0</sub> <sup>a</sup> |
| <b>196</b> | 484.3 <sup>a</sup> | 0.0012 <sup>a</sup> | S <sub>1</sub> →S <sub>0</sub> <sup>a</sup> |
|            | 514.6 <sup>a</sup> | 0.0269 <sup>a</sup> | S <sub>1</sub> →S <sub>0</sub> <sup>a</sup> |
| <b>197</b> | 496.7 <sup>b</sup> | 0.0041 <sup>b</sup> | S <sub>1</sub> →S <sub>0</sub> <sup>b</sup> |
|            | 466.4 <sup>a</sup> | 0.0162 <sup>a</sup> | S <sub>1</sub> →S <sub>0</sub> <sup>a</sup> |
| <b>199</b> | 487.4 <sup>b</sup> | 0.0142 <sup>b</sup> | S <sub>1</sub> →S <sub>0</sub> <sup>b</sup> |
| <b>200</b> | 456.5 <sup>a</sup> | 0.0506 <sup>a</sup> | S <sub>1</sub> →S <sub>0</sub> <sup>a</sup> |

a: the results were from the level of TD-DFT//B3LYP/6-31+G(d)/SMD(H<sub>2</sub>O). b: the results were from the level of TD-DFT//M06-2X/6-31+G(d)/SMD(H<sub>2</sub>O).



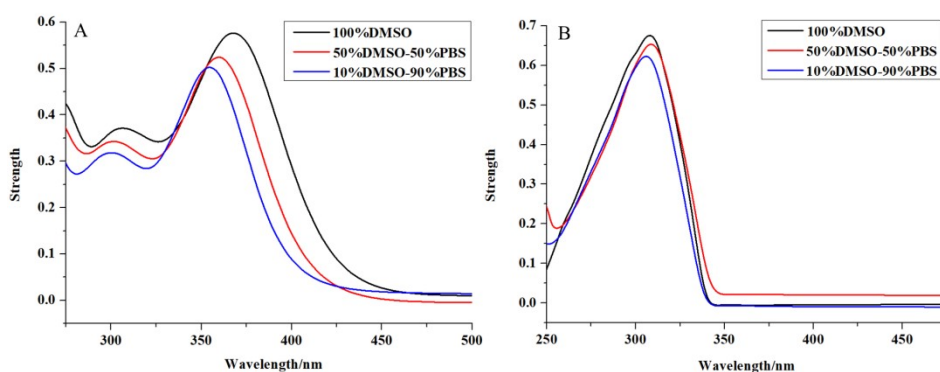

Figure S2. The UV-vis spectra of (A) molecule **18** and (B) **134** with the concentration of 100  $\mu\text{M}$  in different solvent (100%DMSO, 50%DMSO and 10%DMSO).

Table S3. Calculated ground state transient dipole moment ( $\mu_{00}$ ) of **18** and **134** compounds with DMSO and H<sub>2</sub>O solvent model.

| Molecules  | $\mu_{00}/\text{Debye}$ |                  |
|------------|-------------------------|------------------|
|            | DMSO                    | H <sub>2</sub> O |
| <b>18</b>  | 5.7895                  | 7.0117           |
| <b>134</b> | 2.2178                  | 2.6613           |

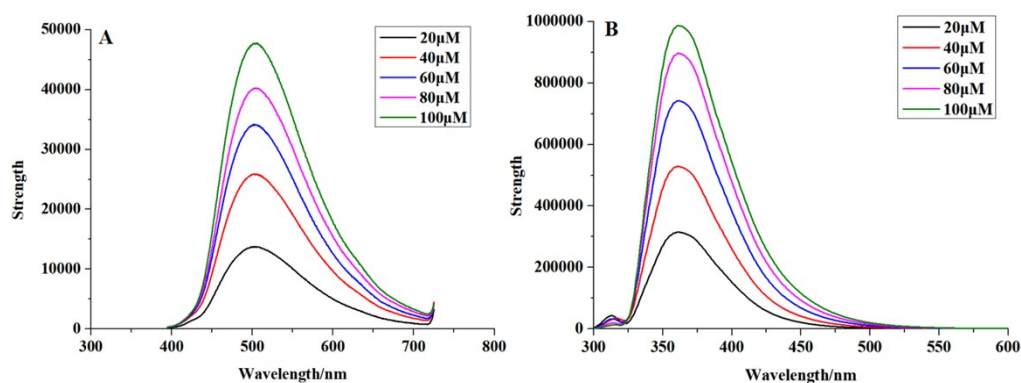

Figure S3. The emission spectra of compound **18** (A) and **134** (B) with different concentration in 10%DMSO-90%PBS solvent.

Table S4. The calculated energies of HOMO, LUMO and HOMO-LUMO gap for molecules **134**, **134-E** and **134-RETCl**.

| Molecules                                                                                           | HOMO/eV | LUMO/eV | HOMO-LUMO gap /eV |
|-----------------------------------------------------------------------------------------------------|---------|---------|-------------------|
| 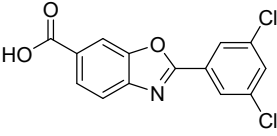<br><b>134</b>   | -6.97   | -2.65   | 4.32              |
| <br><b>134-E</b> | -6.64   | -2.90   | 3.74              |

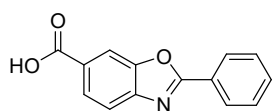

-6.63

-2.29

4.34

**134-RETCI**

---

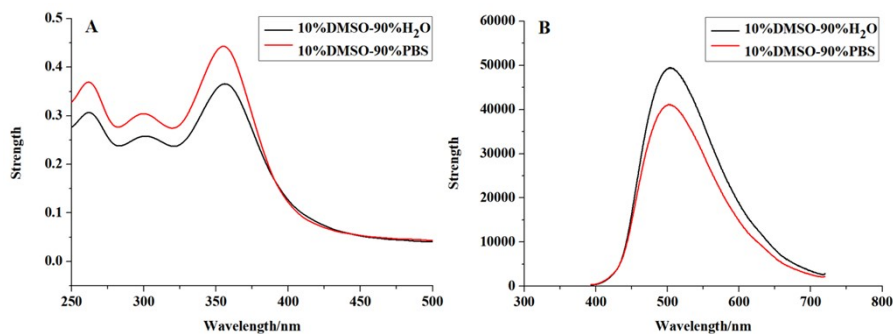

Figure S4. The UV-vis (A) and emission spectra (by excited at 370 nm, B) of compound **18** using 10%DMSO-90%H<sub>2</sub>O and 10%DMSO-90%PBS solvent from experiments.

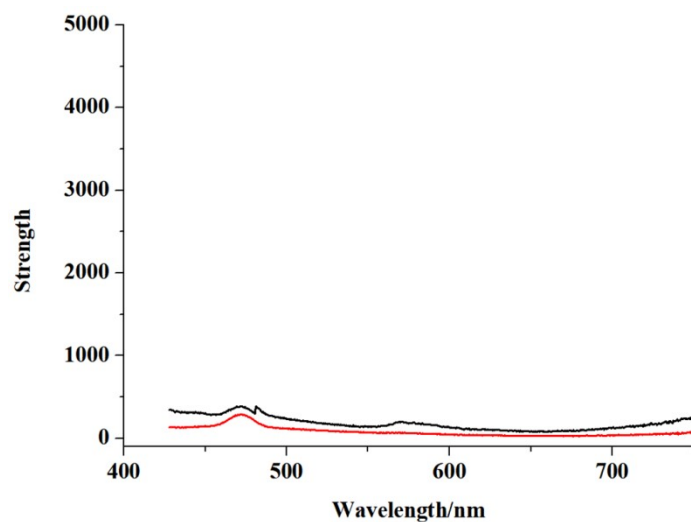

Figure S5. The emission spectra of compound **134** by excitation at 405 nm (black) and 488 nm (red) wavelength in 10%DMSO-90%PBS solvent.

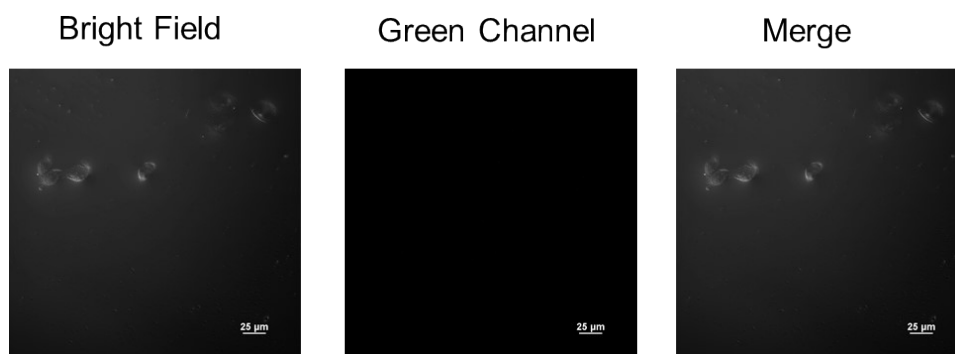

Figure S6. Confocal microscopy colocalization images of compound **134** with 10 μM in HeLa cells.

Table S5. Calculated TPA properties including the maximum TPA cross-section ( $\delta_{max}^{TPA}$ ), corresponding TPA wavelength ( $\lambda_{max}^{TPA}$ ), and transition nature of **18** and **134** in gas (a) and water (b) by B3LYP functional.

| Molecules  | $\lambda_{max}^{TPA}/\text{nm}$ | $\delta_{max}^{TPA}/\text{GM}$ | Transition nature                           |
|------------|---------------------------------|--------------------------------|---------------------------------------------|
| <b>18</b>  | 815.7 <sup>a</sup>              | 319 <sup>a</sup>               | S <sub>0</sub> →S <sub>1</sub> <sup>a</sup> |
|            | 879.4 <sup>b</sup>              | 989 <sup>b</sup>               | S <sub>0</sub> →S <sub>1</sub> <sup>b</sup> |
| <b>134</b> | 618.4 <sup>a</sup>              | 3 <sup>a</sup>                 | S <sub>0</sub> →S <sub>1</sub> <sup>a</sup> |
|            | 661.2 <sup>b</sup>              | 4 <sup>b</sup>                 | S <sub>0</sub> →S <sub>1</sub> <sup>b</sup> |
